# Supplementary material
Source: publisher site journal article supplement (https://www.dovepress.com/article/300250)
Supplement: Supplementary file 1 [file get_supplementary_file.php]

**Supplemental Table 1.** **Characteristics of laboratory parameters by weight gain after 20 years of age.**

|  | Weight gain after 20 years of age | | P value***** |
| --- | --- | --- | --- |
|  | <10kg  (n=3601) | ≥ 10kg  (n=3601) |
| Plasma glucose (mg/dL) | 99.0 (90.0-112.0) | 99.0 (91.0-113) | 0.179 |
| HbA1c (%) | 5.6 (5.4-6.0) | 5.7 (5.4-6.0) | <0.001 |
| Total cholesterol (mg/dL) | 205 (183-228) | 206 (186-229) | 0.082 |
| Triglycerides (mg/dL) | 120 (84-170) | 132 (93-192) | <0.001 |
| HDL-C (mg/dL) | 58.0 (49.0-69.0) | 56.0 (47.0-66.0) | <0.001 |
| LDL-C (mg/dL) | 120 (102-140) | 122 (103-142) | 0.004 |
| AST (U/L) | 24.0 (20.0-29.0) | 24.0 (20.0-29.0) | 0.022 |
| ALT (U/L) | 21.0 (16.0-28.0) | 23.0 (17.0-32.0) | <0.001 |
| GGT (U/L) | 26.0 (18.0-43.0) | 29.0 (20.0-51.0) | <0.001 |
| BUN (mg/dL) | 15.0 (13.0-18.0) | 15.0 (12.0-17.0) | <0.001 |
| Cr (mg/dL) | 0.67 (0.57-0.80) | 0.67 (0.57-0.79) | 0.486 |
| eGFR (ml/min/ 1.73 m2) | 80.0 (69.7-90.1) | 78.7 (68.7-89.5) | 0.034 |
| UA (mg/dL) | 5.1 (4.4-6.1) | 5.3 (4.5-6.2) | <0.001 |
| Glycated albumin (%) | 14.5 (13.6-15.5) | 14.3 (13.5-15.4) | <0.001 |

**Notes:** *, Mann-Whitney U-test. Median values are shown (25th percentile-75th percentiles).

**Abbreviations:** HDL-C, high-density lipoprotein cholesterol; LDL-C, low-density lipoprotein cholesterol; AST, aspartate aminotransferase; ALT, alanine aminotransferase; GGT, gamma-glutamyl transferase; UA, uric acid; eGFR, estimated glomerular filtration rate.
